# Supplementary material for: A multilevel, multicomponent childhood obesity prevention group-randomized controlled trial improves healthier food purchasing and reduces sweet-snack consumption among low-income African-American youth
Source: PubMed Central journal article supplement (PMC6206663; doi:10.1186/s12937-018-0406-2), 2018-10-29

Logo

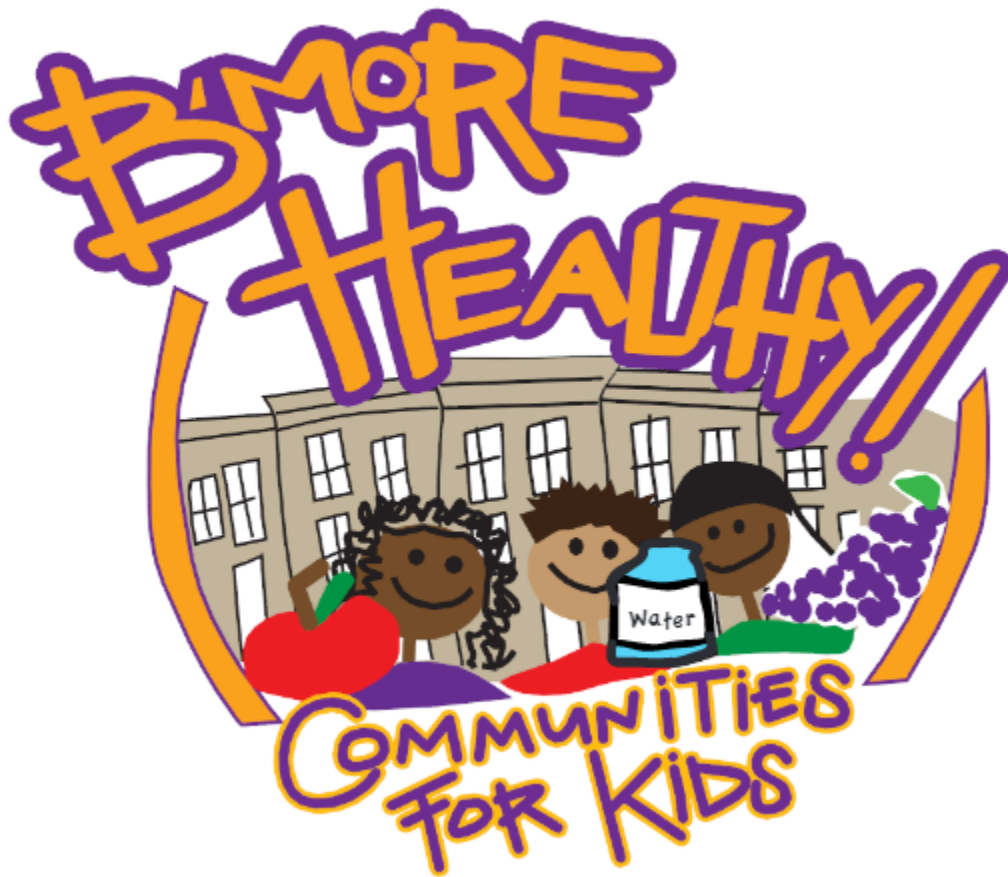

# Shelf Talkers

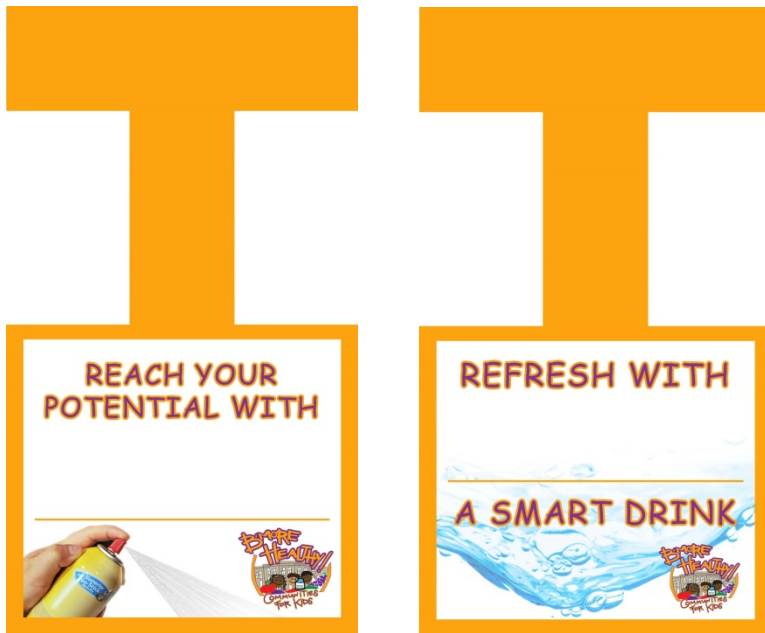

Refresh with a **SMART** drink:

JHU does not endorse any product referenced in this trial which are mentioned only for illustrative purposes; in no way is JHU suggesting that any referenced product is healthier, better or worse than any other product.

# Posters

**REFRESH WITH A SMART DRINK**

**CHOOSE WATER**

[Facebook.com/bhck1](#)  
[Instagram/Bmore4Kids](#)  
[Bmorehealthyc4k@gmail.com](mailto:Bmorehealthyc4k@gmail.com)

**BMORE HEALTHY! COMMUNITIES FOR KIDS**

JHU does not endorse any product referenced in this trial which are mentioned only for illustrative purposes; in no way is JHU suggesting that any referenced product is healthier, better or worse than any other product.

**HUNGRY FOR A SWEET SNACK?**

**Refuel with a low fat & low sugar granola bar or fruit**

[Facebook.com/bhck1](#)  
[Instagram/Bmore4Kids](#)  
[Bmorehealthyc4k@gmail.com](mailto:Bmorehealthyc4k@gmail.com)

**BMORE HEALTHY! COMMUNITIES FOR KIDS**

© 2014 The Johns Hopkins University. All rights reserved. For more information, visit www.bmore4kids.org

Try a  
**FRESH SIDE & REFRESH**  
 with a smart drink!

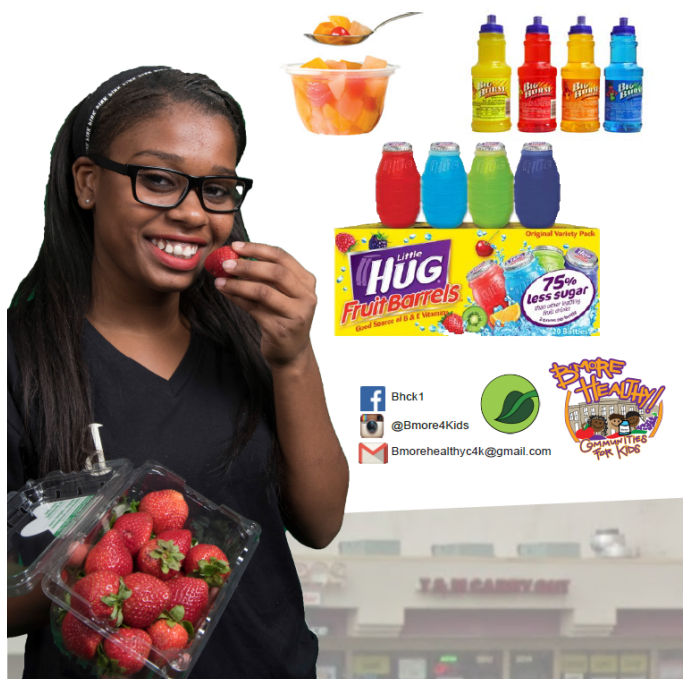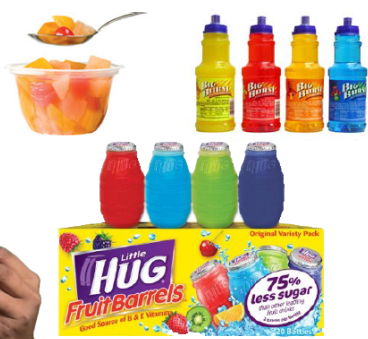

f Bhck1  
 @Bmore4Kids  
 Bmorehealthyc4k@gmail.com

**BEFORE HEALTHY!**  
 COMMITTEES FOR KIDS

Try a  
**FRESH SIDE OR DRINK**  
 with your meal!

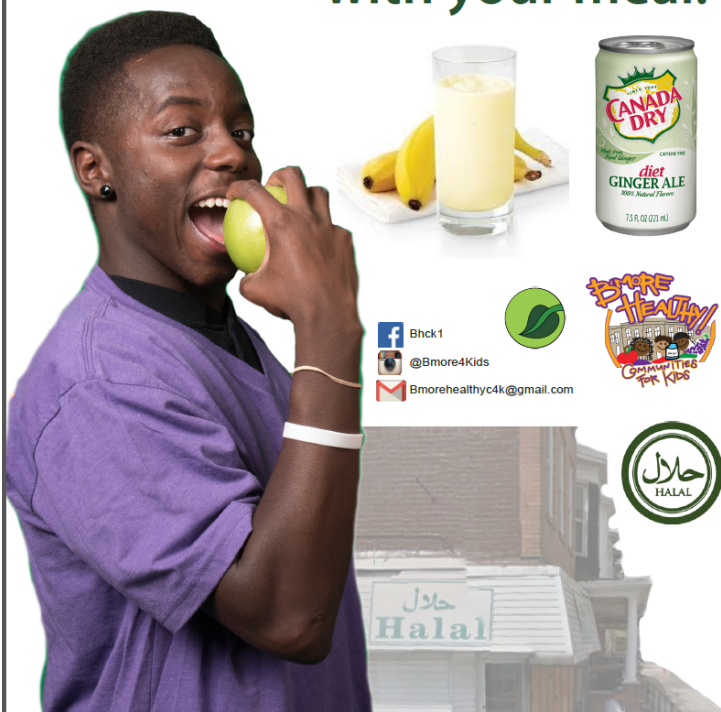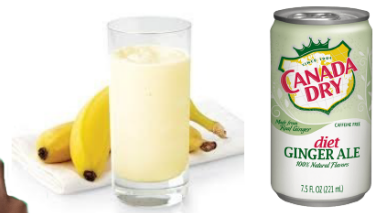

f Bhck1  
 @Bmore4Kids  
 Bmorehealthyc4k@gmail.com

**BEFORE HEALTHY!**  
 COMMITTEES FOR KIDS

حلال  
 HALAL

**\$7.50**

Try a  
**Combo Meal**  
 at Halal Foods

- 1 Pick your sandwich**  
 Turkey sandwich with low fat mayo, 95% lean turkey, 100% whole wheat bread, lettuce, tomato & reduced fat provolone cheese.
- 2 Pick your side**  
 Cole Slaw
- 3 Pick your drink**  
 Bottled Water
 

Look for the leaf to find the **fresh** combo meals!

f Bhck1  
 @Bmore4Kids  
 Bmorehealthyc4k@gmail.com

**BEFORE HEALTHY!**  
 COMMITTEES FOR KIDS

**\$6.75**

Reach your potential with a  
**Combo Meal**  
 at WWW Pizza

- 1 Pick your sandwich**  
 Turkey Wrap
- 2 Pick your side**  
 Fruit Cup
- 3 Pick your drink**  
 Bottled Water
 

Look for the leaf to find the **fresh** combo meals!

f Bhck1  
 @Bmore4Kids  
 Bmorehealthyc4k@gmail.com

**BEFORE HEALTHY!**  
 COMMITTEES FOR KIDS



# Handouts

## High Energy Noodles Recipe

### Directions:

1. Cook the noodles (without the flavoring packet) according to package directions. Drain.
2. Heat a large skillet over medium-heat until hot. Add chicken and cook, stirring frequently, until no longer pink. *If you are using pre-cooked chicken it can be heated in the oven.*
3. Add vegetables and cover. Cook until vegetables are cooked through (about 5 minutes).
4. Add soy sauce, garlic and 1/2 the seasoning packet to water. Mix well. Pour over chicken and vegetables, add noodles and toss to mix.

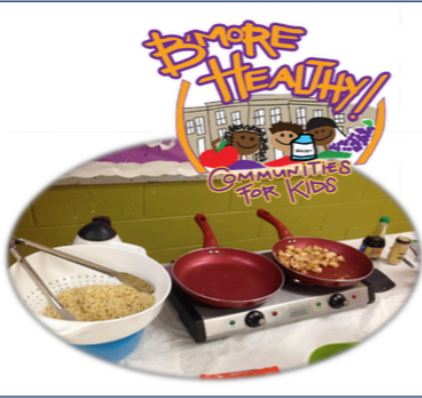

## Refuel with Banana Waldorf Salad

### 1 Prepare your ingredients!

- 1 banana sliced
- 1/2 apple sliced
- 1 small serving size container of low fat yogurt
- 1 pinch of cinnamon (optional)
- 1/8 cup of your favorite nuts or seeds

### 2 Add yogurt to a small bowl & mix in the bananas and sliced apples. Top with cinnamon & walnuts.

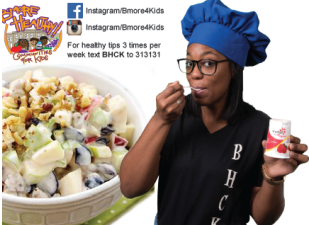

## STOPLIGHT SNACKS

**RARELY**

Eat snacks high in calories, salt or fat, such as packaged cookies, potato chips and candy bars.

**SOMETIMES**

Eat snacks with a moderate amount of calories, such as light string cheese, baked chips and low-fat cereal bars.

**ANYTIME**

Eat snacks low in calories and fat that are loaded with calcium, fiber and vitamins, such as fresh fruits, vegetables and non-fat yogurt.

## RETHINK YOUR DRINK! water has zero calories

- ✓ Keeps you hydrated
  - ✓ Hydration helps prevent overeating
  - ✓ Boosts your energy
  - ✓ Helps you burn fat
  - ✓ Keeps skin healthy
  - ✓ Helps digestion
  - ✓ Helps relieve headaches
- REFRESH with a smart drink!**

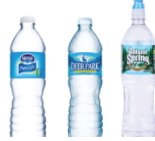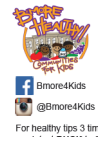

For healthy tips 3 times per week text BHCK to 313131

## Get a BOOST of flavor with FRUIT INFUSION drinks!

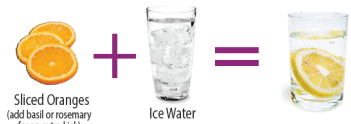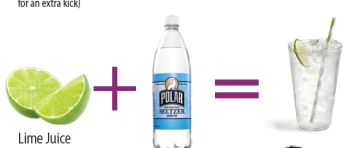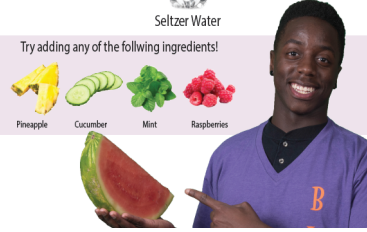

\*All does not include any product information. All products are recommended only for informational purposes. All suggestions are only informational and do not constitute a recommendation. ©2014 Bmore4Kids. All rights reserved. Bmore4Kids.com

## Reach your potential with 100% whole grains!

**Low Sugar Cereal**  
Simple! Try Cheerios, Kix or Life with fresh or dried fruit.

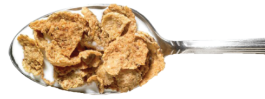

**High Fiber Cereal**  
Fiber helps you feel full longest! Try unsweetened Shredded Wheat or plain oatmeal.

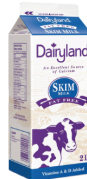

**Skim or 1% Milk**  
Tastes just as good with fewer calories! Skim and 1% milk have the same amount of vitamins and minerals as whole milk.

## Make your morning Naturally Sweet

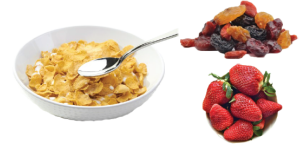

1. Choose high fiber, low sugar cereal
2. Choose skim, nonfat or 1% milk (or Lactaid)
3. Add fresh or dried fruit to sweeten!

1 cup low sugar cereal  
1/2 cup of fresh fruit or 1/4 of dried fruit

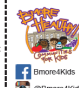

For healthy tips 3 times per week text BHCK to 313131



# Giveaways

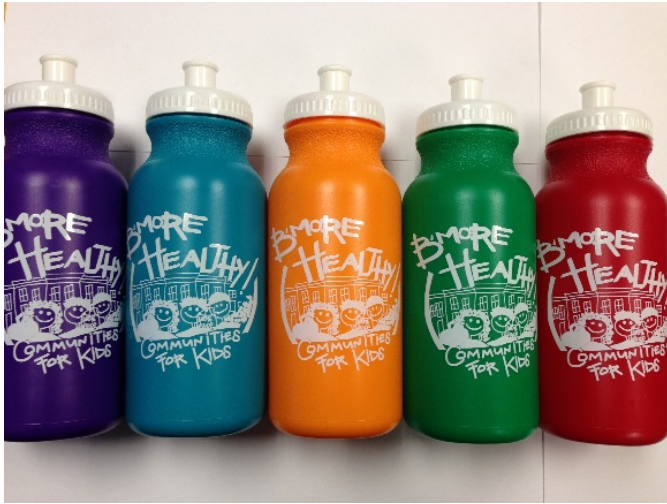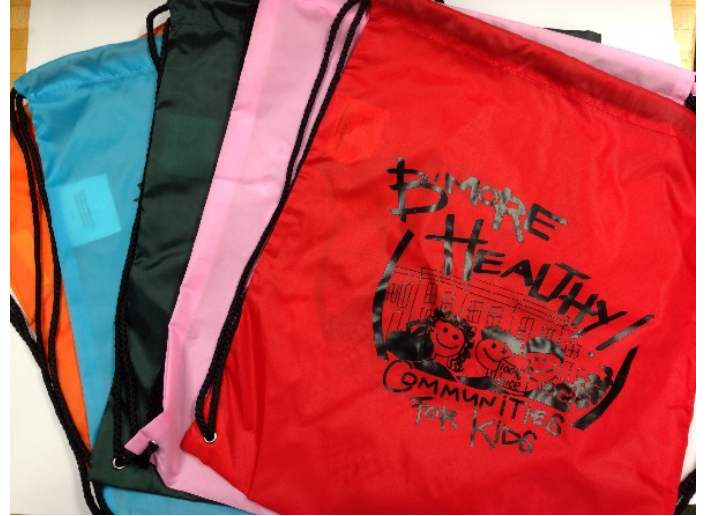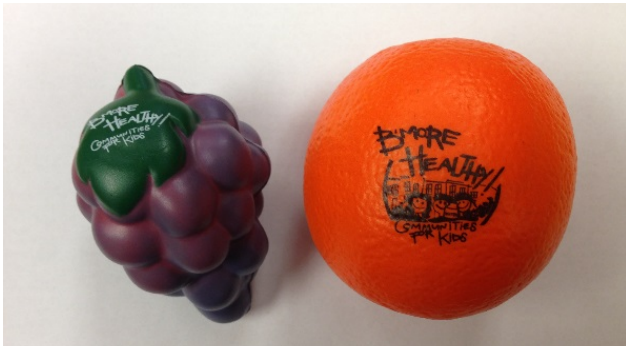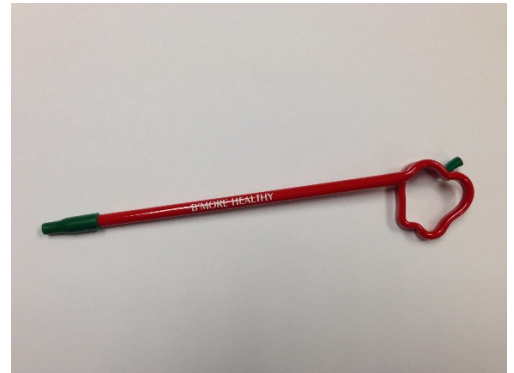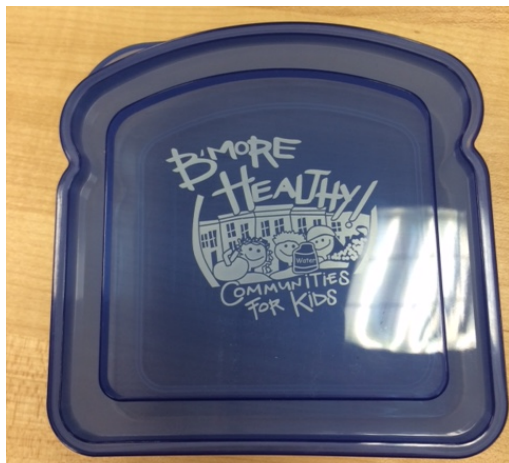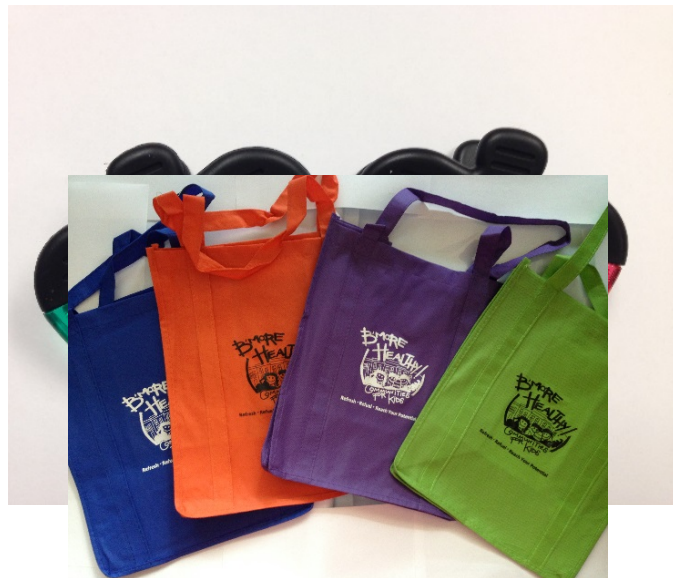

# Educational Activities

## Rethink your drink #1

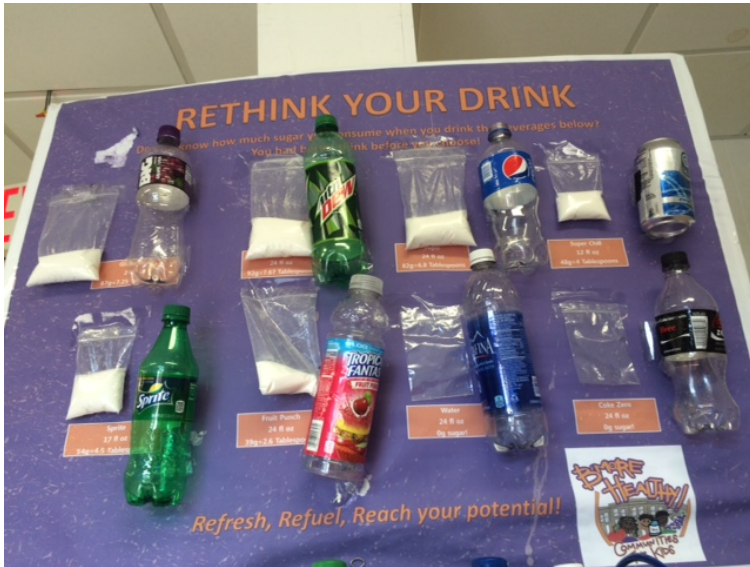

Do you look at the nutrition label?

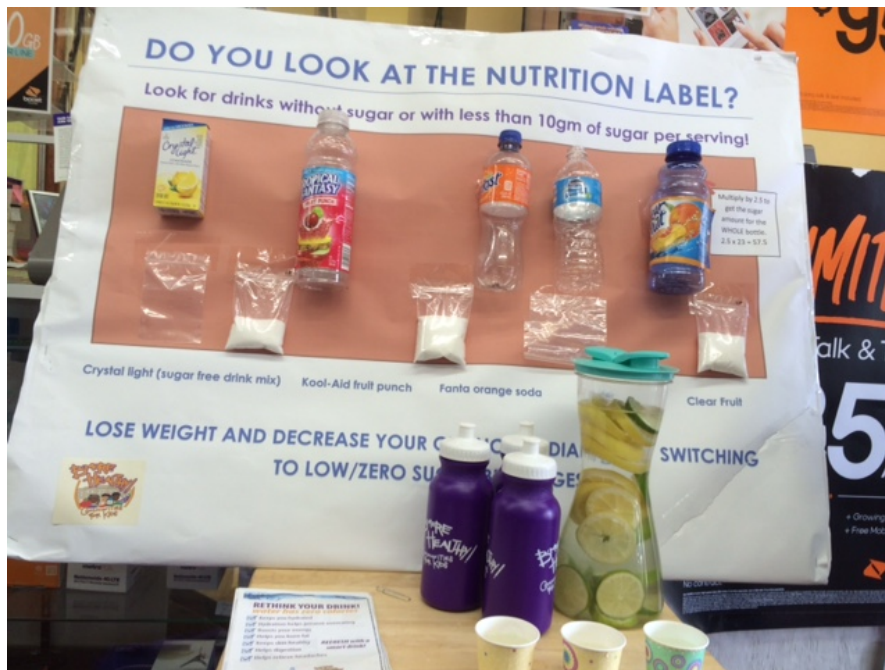

Have a craving for something sweet?

**Have a craving for SOMETHING SWEET?**

The next time you want to buy a sweet snack, which would you choose?

| Snack       | Quantity | Sugar Content     |
|-------------|----------|-------------------|
| M&M's       | 1 bag    | 23 grams of sugar |
| Granola Bar | 1 bar    | 7 grams of sugar  |
| Sour Patch  | 1 bag    | 36 grams of sugar |
| Donuts      | 1 pack   | 23 grams of sugar |
| Tastykake   | 1 pie    | 25 grams of sugar |

Granola bars are the best choice because they are low in sugar AND are high in other nutrients, such as fiber!

**Refresh. Refuel. Reach your potential**





# Social Media

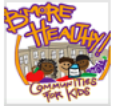

# B'more Healthy Communities for Kids

Published by Ivory Loh [?] · June 11 at 7:00am · 🌐

#FunFactFridayBHCK Did you know...that Raisin Bran has more #fiber than Corn Flakes and Kix? Corn Flakes and Kix are great low sugar cereal options but Raisin Bran wins in fiber! Refuel with these cereal in the morning! #RefuelBHCK

### Kellogg's Corn Flakes®

| Nutrition Facts               |                               |
|-------------------------------|-------------------------------|
| Serving Size 1 Cup (28g)      |                               |
| Amount Per Serving            | Cereal with 1/2 cup skim milk |
| <b>Calories</b>               | 100 140                       |
| Calories from Fat             |                               |
| <b>Total Fat</b> 0g*          |                               |
| Saturated Fat 0g              |                               |
| Trans Fat 0g                  |                               |
| Polyunsaturated Fat 0g        |                               |
| Monounsaturated Fat 0g        |                               |
| <b>Cholesterol</b> 0mg        | <b>0%</b> <b>0%</b>           |
| <b>Sodium</b> 200mg           | <b>8%</b> <b>11%</b>          |
| <b>Potassium</b> 45mg         | <b>1%</b> <b>7%</b>           |
| <b>Total Carbohydrate</b> 24g | <b>8%</b> <b>10%</b>          |
| Dietary Fiber 1g              | <b>4%</b> <b>4%</b>           |
| Sugars 3g                     |                               |
| <b>Protein</b> 2g             |                               |



### Nutrition Facts

Serving Size: 1-1/3 cup (30g)

| Amount Per Serving        |                     |
|---------------------------|---------------------|
| <b>Calories</b>           | 120                 |
| <b>Total Fat</b>          | 1 g                 |
| Saturated Fat             | 0.14                |
| Trans Fat                 | 0 g                 |
| <b>Cholesterol</b>        | 0 mg                |
| <b>Sodium</b>             | 219.9 mg            |
| <b>Potassium</b>          | 39.9 mg <b>1%</b>   |
| <b>Total Carbohydrate</b> | 25.3 g <b>8%</b>    |
| Dietary Fiber 0.99 g      | <b>4%</b>           |
| Sugars                    | 3 g                 |
| Sugar Alcohols            |                     |
| <b>Protein</b>            | 2 g                 |
| <b>Vitamin A</b>          | 500.1 IU <b>10%</b> |
| <b>Vitamin C</b>          | 6 mg <b>10%</b>     |
| <b>Calcium</b>            | 150 mg <b>15%</b>   |
| <b>Iron</b>               | 8.4 mg <b>47%</b>   |



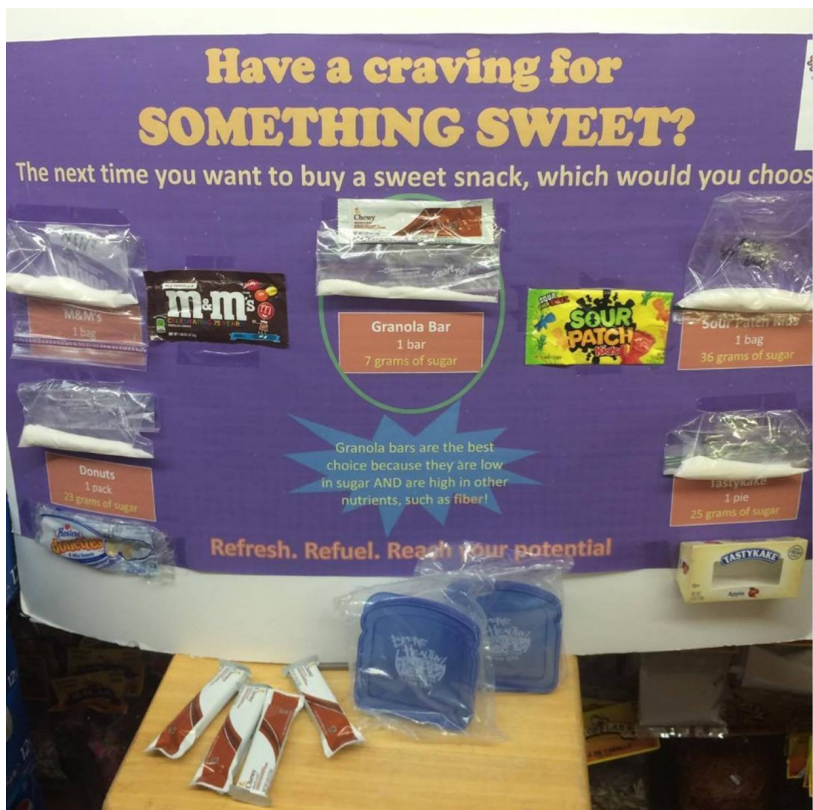

**bmore4kids**  
Baltimore, Maryland

74 likes 4d

**bmore4kids** #Bmore4Kids is promoting chewy granola bars at #Baltimore corner stores this week! #DidYouKnow that chewy granola bars are a healthier alternative to candy and snack cakes because they are lower in sugar and higher in fiber? Check out our Facebook page (link in bio) to see which stores we are visiting, and stop by to grab a free granola bar!

#RefuelBHCK #SnackSmartBHCK #community #LowSugar #HealthyEats #HealthyKids #obesity #love #food #photooftheday #Maryland

leslieangel 🌸🌸

♡ Add a comment... ⋮

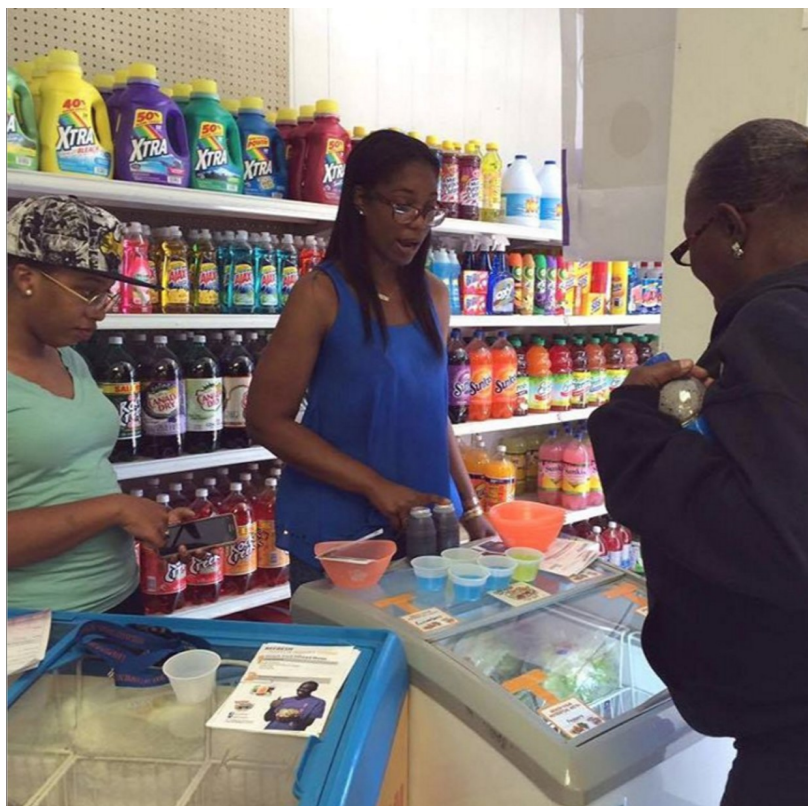

**bmore4kids**  
Family Food Market

81 likes 4w

**bmore4kids** #DidYouKnow Hugs fruits drinks contain less sugar than soda? #Bmore4Kids Youth Leaders were at Family Food Market yesterday! They educate customers coming into corner stores and introduce them to low sugar drinks such as Hugs to help them make healthier choices.

#RefreshBHCK #DrinkSmartBHCK #CornerStore #youth #leaders #Baltimore #nutrition #education #obesity #FreshFood #GreenEats #LowSugar

♡ Add a comment... ⋮

# Mailing (wave 2 only)

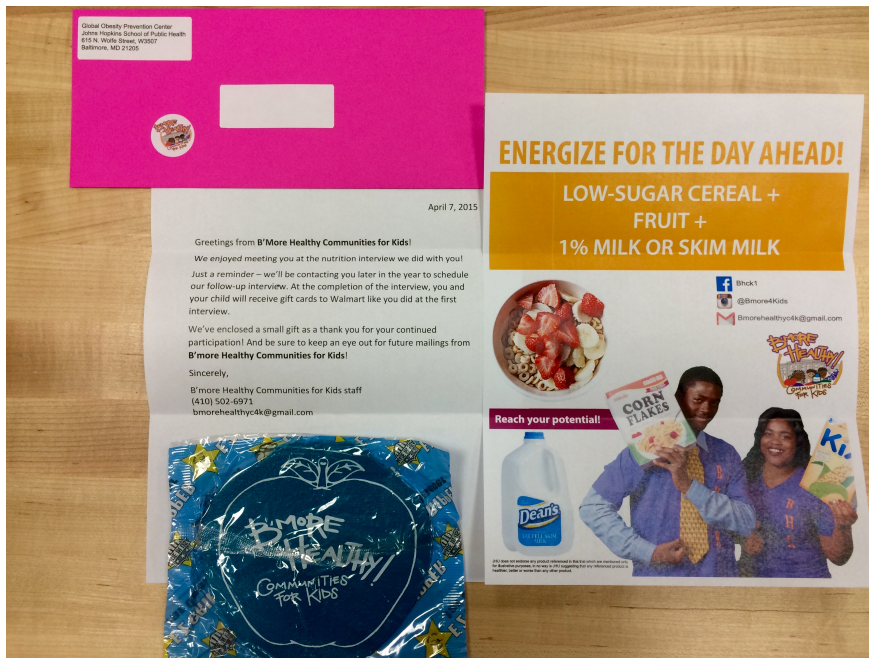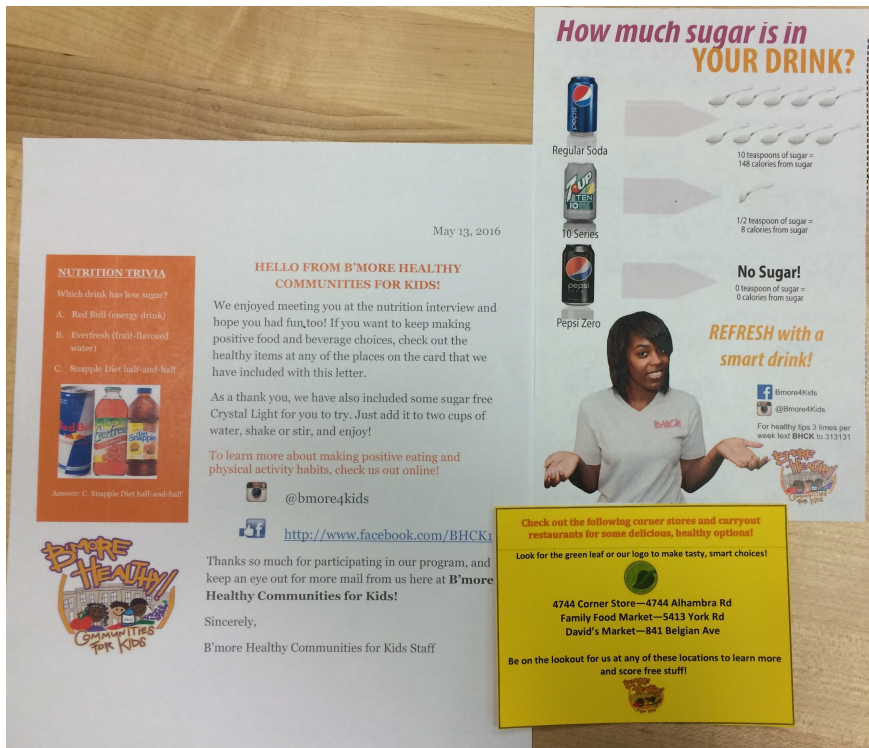

Supplement: 12937_2018_406_MOESM2_ESM.pdf [file 12937_2018_406_MOESM2_ESM.pdf]
